# Supplementary material
Source: PubMed Central journal article supplement (PMC3527251)
Supplement: 1a7d518ad2d375cd6183da2366f5a3a3_genetics.112.145912-15.pdf [file 1a7d518ad2d375cd6183da2366f5a3a3_genetics.112.145912-15.pdf]

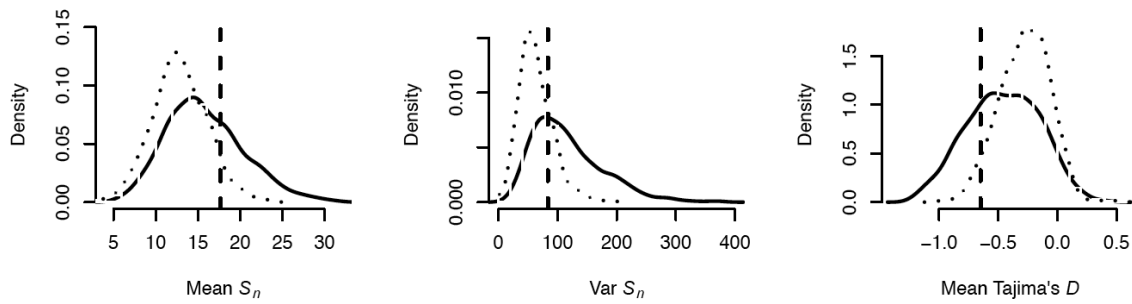

**Figure S7** Predictions of the Bottleneck versus Population Expansion in Africa. Solid line: Bottleneck, dotted line: Population expansion, vertical dashed line: observed value. Parameters for predictive simulations are drawn from the posterior distributions generated by the regression method (see Materials and Methods).
