# Supplementary material
Source: PubMed Central journal article supplement (PMC3527251)
Supplement: 1d2ee773a4fcefca70a0b4764ad747ab_genetics.112.145912-14.pdf [file 1d2ee773a4fcefca70a0b4764ad747ab_genetics.112.145912-14.pdf]

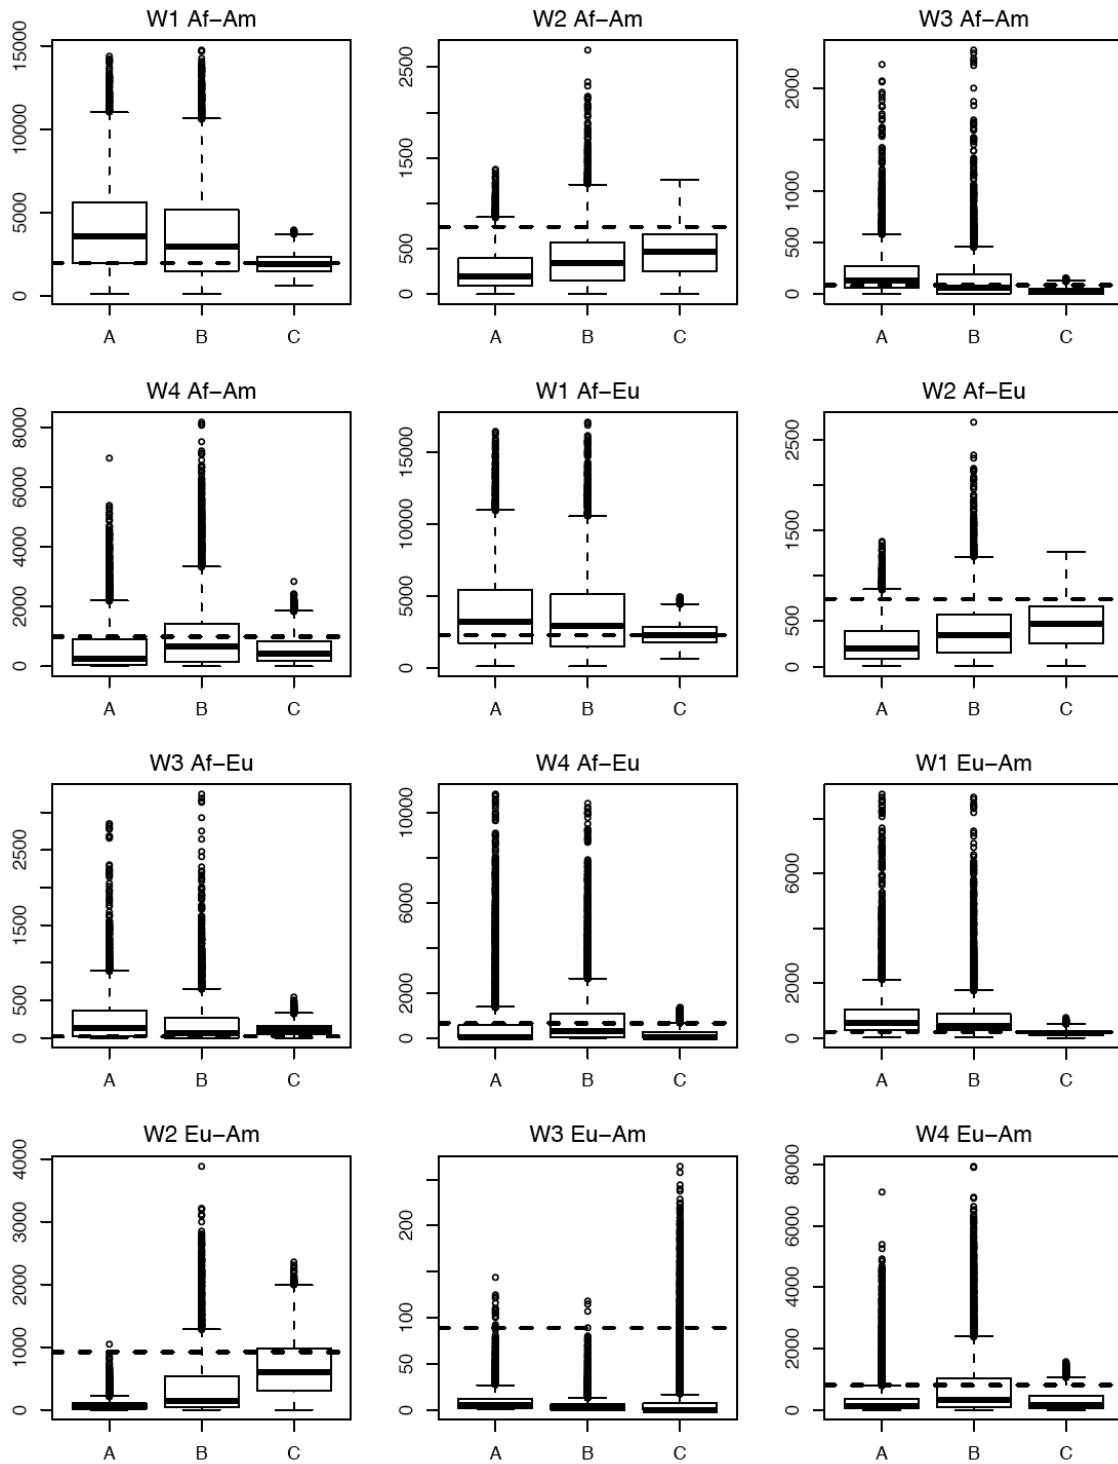

**Figure S9** Predictions of the JSFS for models A, B and C based on the rejection method. The horizontal dashed line represents the observed value.
