# Supplementary material
Source: PubMed Central journal article supplement (PMC3527251)
Supplement: 5db6bf6667878df288ea08ded41600a2_genetics.112.145912-7.pdf [file 5db6bf6667878df288ea08ded41600a2_genetics.112.145912-7.pdf]

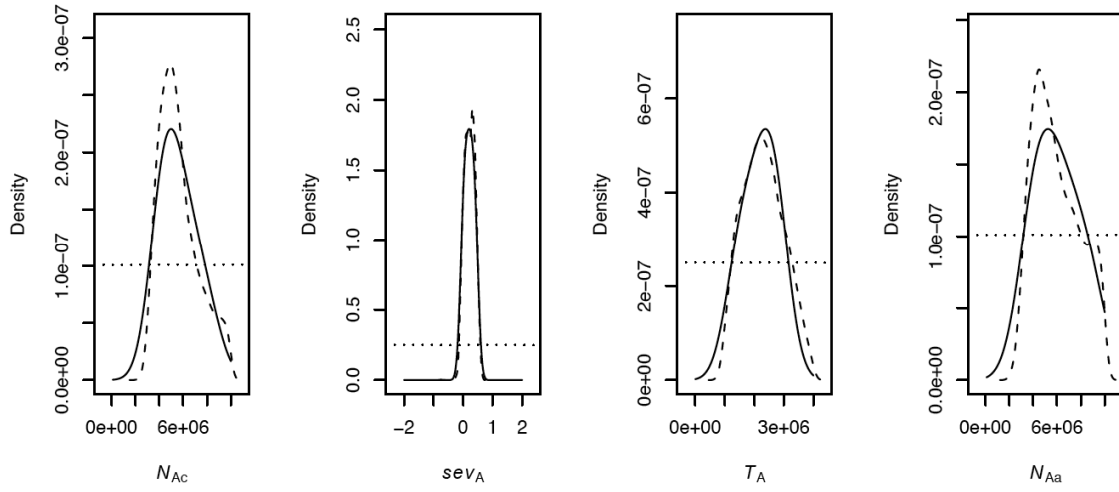

**Figure S6** Posteriors of the Bottleneck model in Africa. Posteriors are represented by the rejection method (dashed line) and the regression method (solid line). Parameter abbreviations are explained in Table 3. Mode and confidence interval for each parameter are shown in Table 4.
