# Supplementary material
Source: PubMed Central journal article supplement (PMC3527251)
Supplement: 9d2f038f04b5cd6821496158224cff77_genetics.112.145912-17.pdf [file 9d2f038f04b5cd6821496158224cff77_genetics.112.145912-17.pdf]

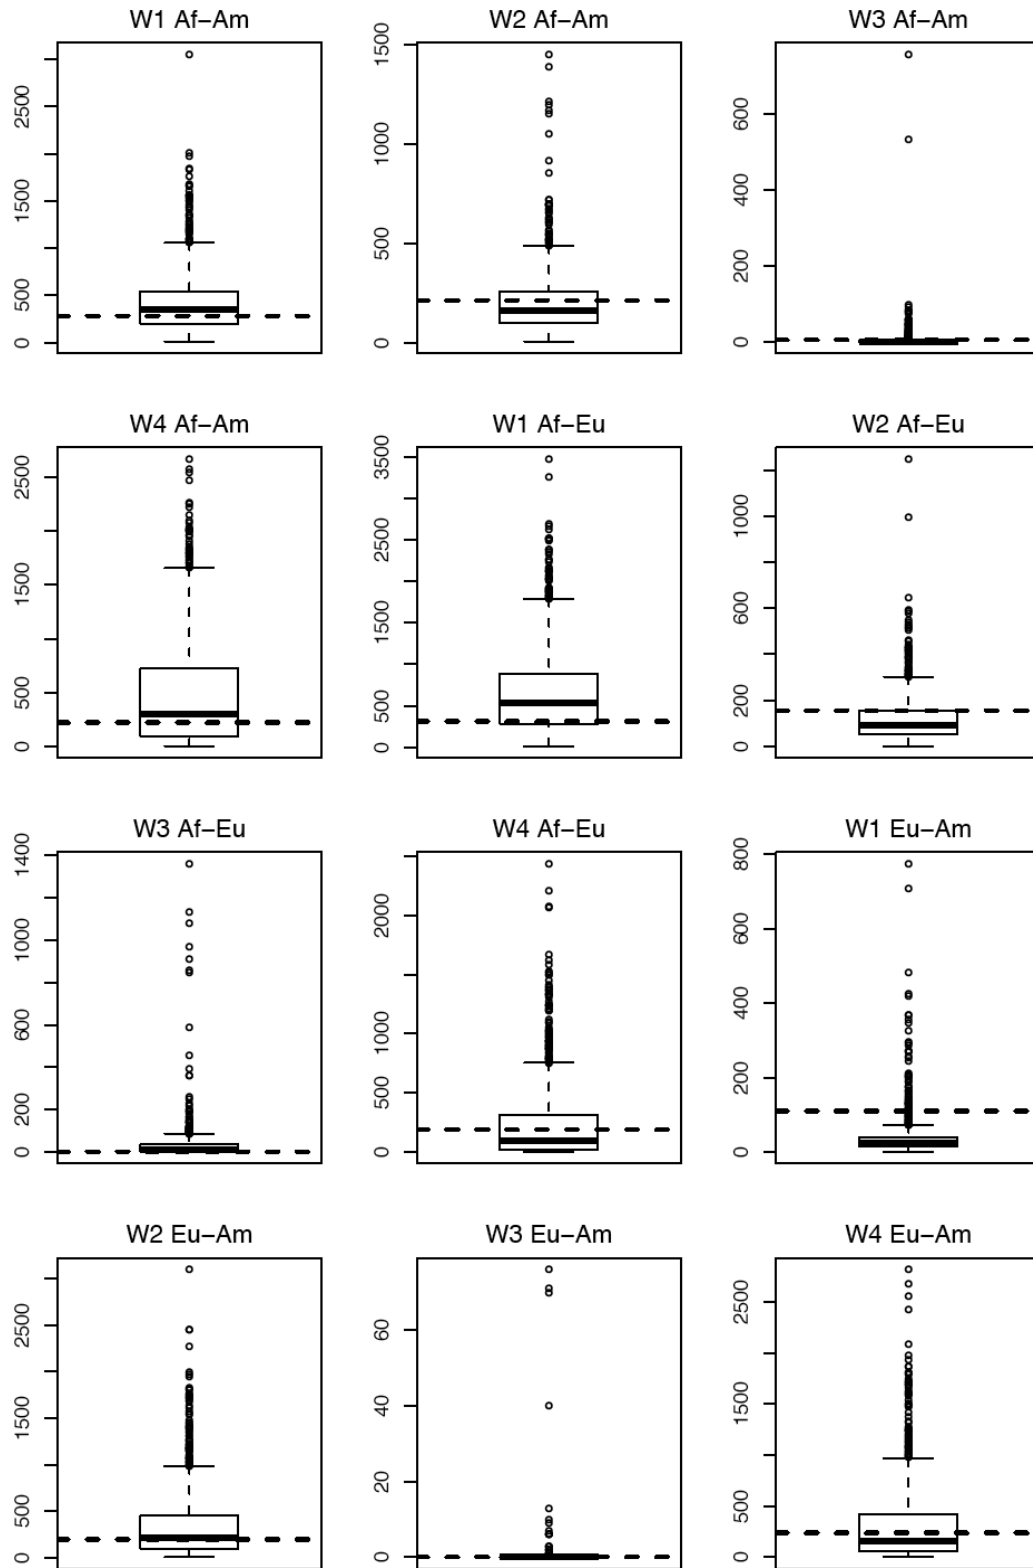

**Figure S14** Predicted JSFS of model C for autosomal data (chromosome 3). Predictions of each Wakeley-Hey (1997) class are shown. Statistics are predicted by sampling parameters from the posterior distributions based on the regression method (see main text for details).
