# Supplementary material
Source: PubMed Central journal article supplement (PMC3527251)
Supplement: 93ee179b249c5844b3ce753697637137_genetics.112.145912-12.pdf [file 93ee179b249c5844b3ce753697637137_genetics.112.145912-12.pdf]

|         |    |    |   |     |         |         |       |
|---------|----|----|---|-----|---------|---------|-------|
|         | 0  | 1  | 2 | ... | $n_2-2$ | $n_2-1$ | $n_2$ |
| 0       | X  | W2 |   |     |         |         | W3    |
| 1       | W1 | W4 |   |     |         |         | W1    |
| 2       |    |    |   |     |         |         |       |
| ...     |    |    |   |     |         |         |       |
| $n_1-2$ |    |    |   |     |         |         |       |
| $n_1-1$ |    |    |   |     |         |         |       |
| $n_1$   | W3 | W2 |   |     |         |         | X     |

**Figure S2** Joint Site Frequency Spectrum (JSFS) classes, according to the Wakeley-Hey model. On left most column we have the sample size  $n_1$  of population 1. On the upper most row we have the sample size  $n_2$  of population 2. The summary statistics proposed by Wakeley-Hey (1997) are represented by the letters W1 to W4.
