# Supplementary material
Source: PubMed Central journal article supplement (PMC3527251)
Supplement: 99f052e26e1573539020fd13168e2521_genetics.112.145912-2.pdf [file 99f052e26e1573539020fd13168e2521_genetics.112.145912-2.pdf]

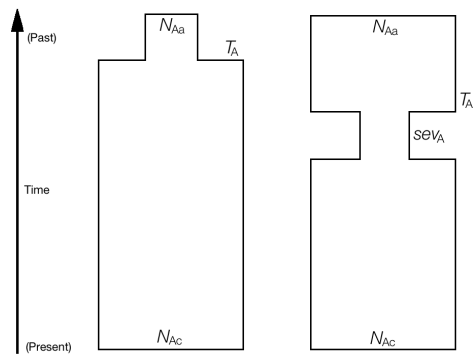

**Figure S3** Population expansion (left) versus Bottleneck (right) model in Africa. The posterior probability of the Expansion model is 0.013. The posterior probability of the Bottleneck model is 0.987. Parameters are explained in Table 3.
