# Supplementary material
Source: PubMed Central journal article supplement (PMC3527251)
Supplement: 5510c76895ad4ecb057c0b35e4823891_genetics.112.145912-10.pdf [file 5510c76895ad4ecb057c0b35e4823891_genetics.112.145912-10.pdf]

**Table S3 Mean squared error (MSE) of the ( $\log_{10}$ ) parameter estimates of model C for varying numbers of simulations.**

|              | 100000   | 200000   | 300000  | 400000   | 500000  | 600000   | 700000  | 800000   | 900000   | 1000000  |
|--------------|----------|----------|---------|----------|---------|----------|---------|----------|----------|----------|
| $N_{Ac}$     | 0.019    | 0.0101   | 0.00718 | 0.00574  | 0.00443 | 0.00296  | 0.00201 | 0.00149  | 0.00154  | 0.00125  |
| $T_{adm}$    | 0.242    | 0.293    | 0.275   | 0.306    | 0.335   | 0.291    | 0.309   | 0.305    | 0.326    | 0.322    |
| $T_{AE}$     | 0.0693   | 0.0388   | 0.0271  | 0.0214   | 0.018   | 0.0147   | 0.0128  | 0.011    | 0.00996  | 0.00927  |
| $T_A$        | 0.0447   | 0.0498   | 0.043   | 0.0407   | 0.0352  | 0.0318   | 0.0317  | 0.025    | 0.0233   | 0.0203   |
| $sev_A$      | 0.0178   | 0.03     | 0.03    | 0.0307   | 0.03    | 0.0311   | 0.0298  | 0.0291   | 0.03     | 0.0326   |
| $N_{Aa}$     | 0.00114  | 0.00243  | 0.00422 | 0.00464  | 0.00661 | 0.00688  | 0.00767 | 0.00835  | 0.00869  | 0.00871  |
| $N_{Ec}$     | 0.0221   | 0.0839   | 0.0831  | 0.111    | 0.0804  | 0.0818   | 0.069   | 0.0658   | 0.0434   | 0.0366   |
| $N_{Nc}$     | 0.000554 | 0.000369 | 0.00059 | 0.000937 | 0.00103 | 0.000636 | 0.00054 | 0.000316 | 0.000336 | 0.000402 |
| $N_{Ea}$     | 0.00605  | 0.00624  | 0.0075  | 0.00801  | 0.0086  | 0.00942  | 0.0104  | 0.011    | 0.0118   | 0.0123   |
| $N_{Na}$     | 0.471    | 0.534    | 0.514   | 0.505    | 0.457   | 0.444    | 0.443   | 0.467    | 0.517    | 0.509    |
| $Prop_{adm}$ | 0.00148  | 0.00149  | 0.00169 | 0.00196  | 0.00213 | 0.00222  | 0.00222 | 0.00221  | 0.00219  | 0.00214  |
