# Supplementary material
Source: PubMed Central journal article supplement (PMC3527251)
Supplement: 78659deb77cef968772408cd2780671a_genetics.112.145912-3.pdf [file 78659deb77cef968772408cd2780671a_genetics.112.145912-3.pdf]

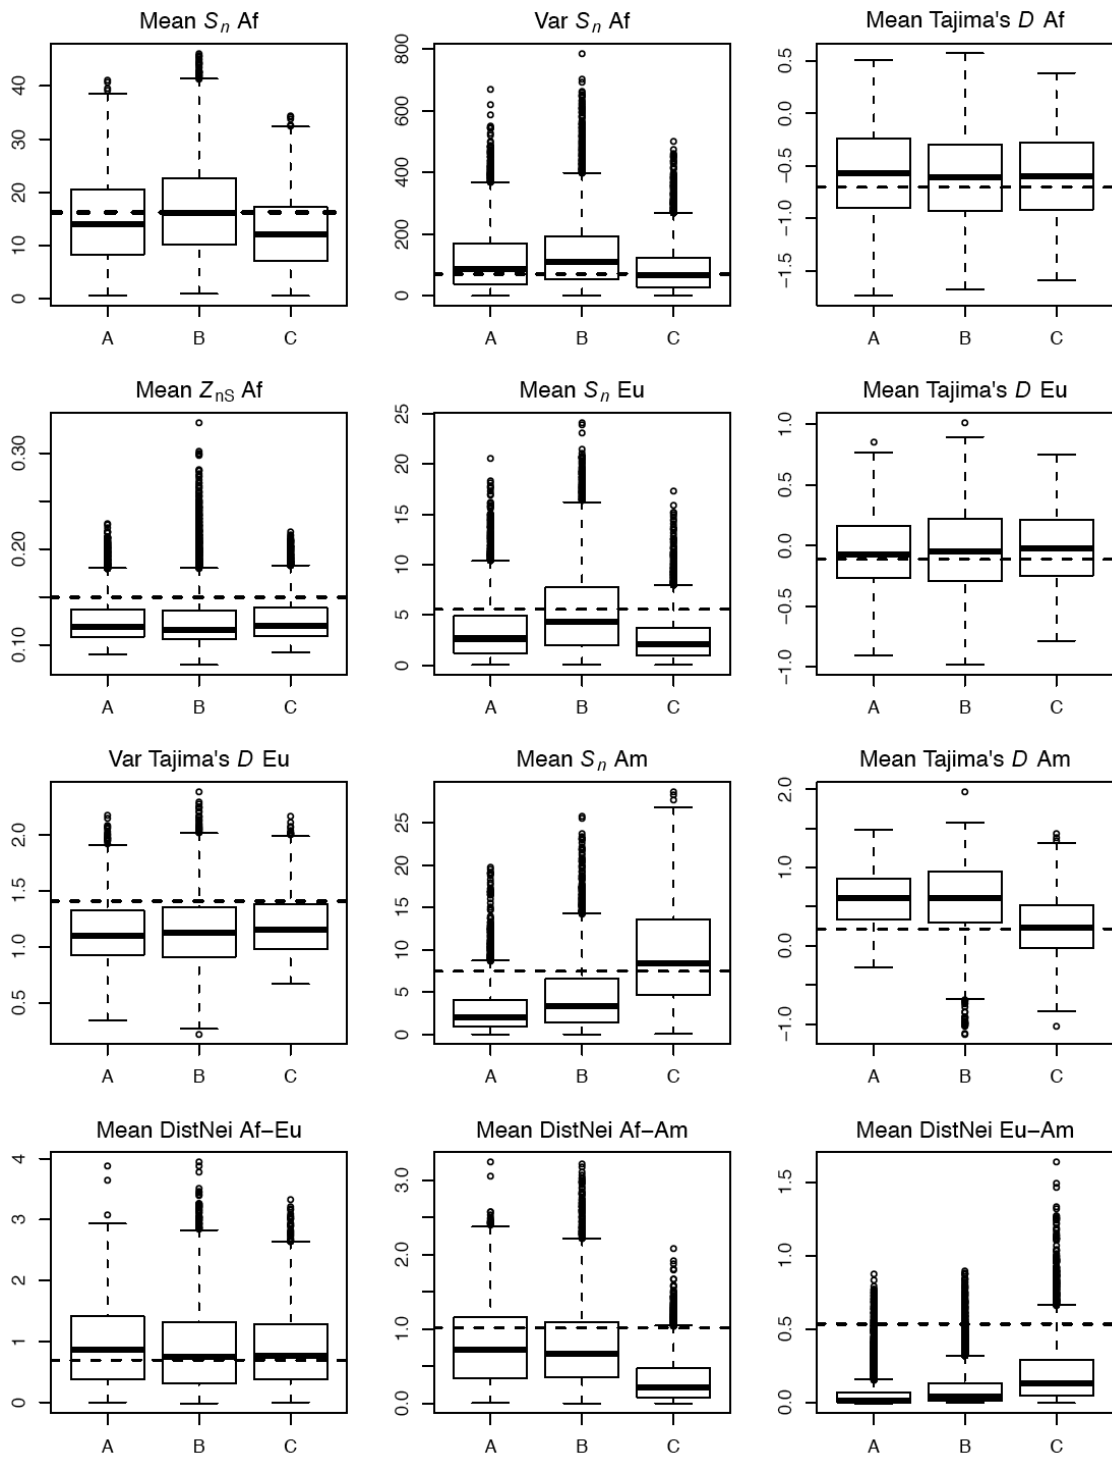

**Figure S8** Predictions of summary statistics for models A, B and C based on the rejection method. The horizontal dashed line represents the observed value.
