# Supplementary material
Source: PubMed Central journal article supplement (PMC3527251)
Supplement: 84197a3469dbed081ec600e52f2150ab_genetics.112.145912-9.pdf [file 84197a3469dbed081ec600e52f2150ab_genetics.112.145912-9.pdf]

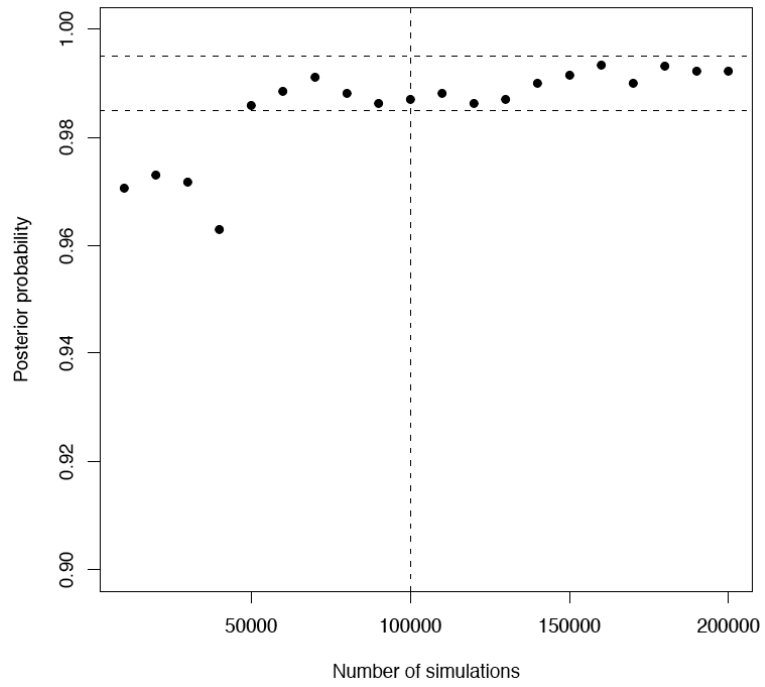

**Figure S4** Behavior of the posterior probabilities of the Bottleneck model for different numbers of simulations. In the case of the Admixture model (model C) the posterior probability is always above 0.999 for different numbers of simulations.
