# Supplementary material
Source: PubMed Central journal article supplement (PMC3527251)
Supplement: a440e85bacb6482e0a077a1fcc9db1b4_genetics.112.145912-4.pdf [file a440e85bacb6482e0a077a1fcc9db1b4_genetics.112.145912-4.pdf]

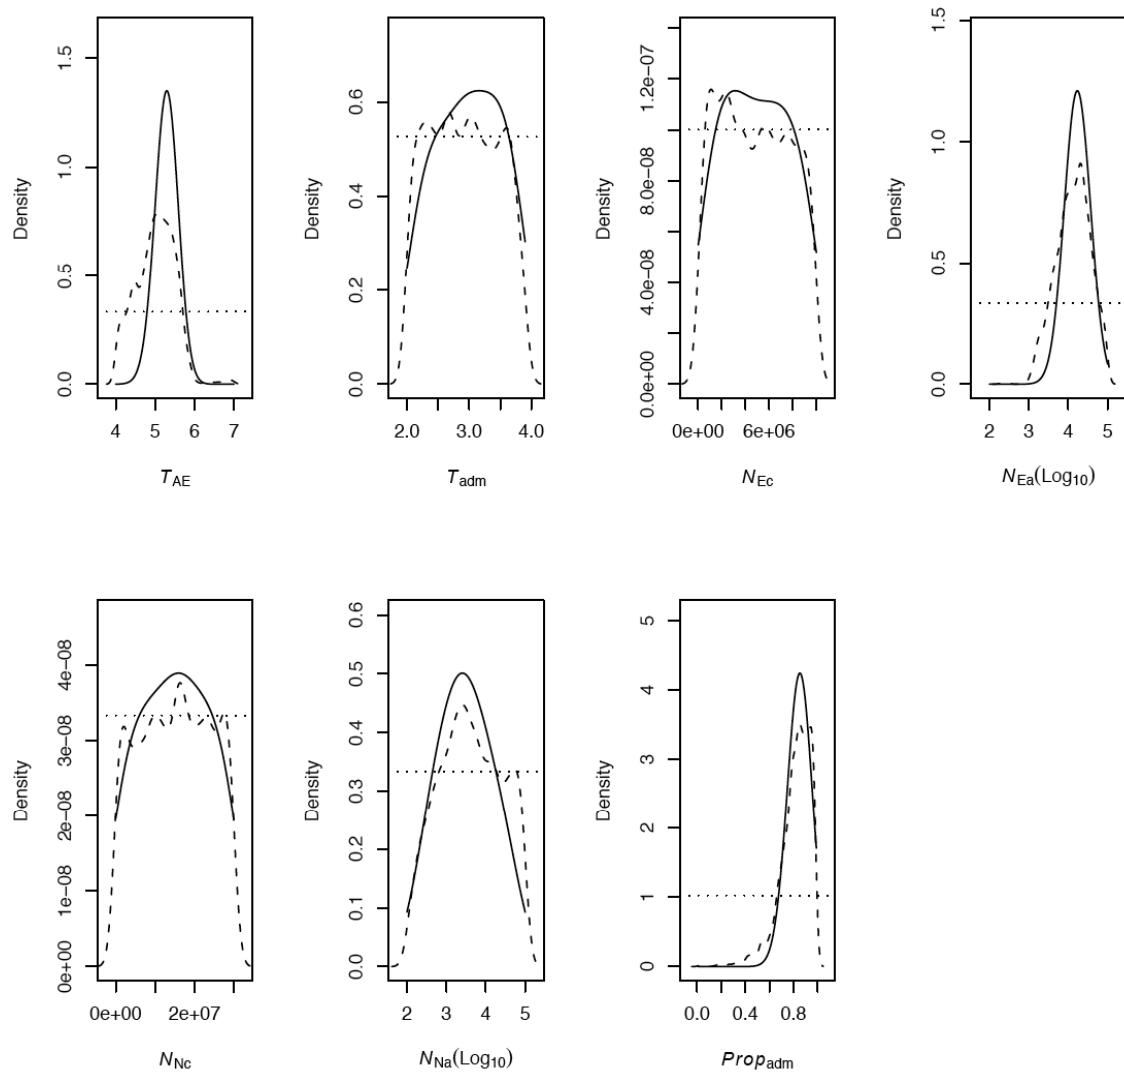

**Figure S10** Posteriors of the Admixture model C. Posteriors are represented by the rejection method (dashed line) and the regression method (solid line). Parameter abbreviations are explained in Table 3. Mode and confidence interval for each parameter are shown in Table 5.
