# Supplementary material
Source: PubMed Central journal article supplement (PMC3527251)
Supplement: c90326a2ad0db5a8c9decaa2a316c5d7_genetics.112.145912-13.pdf [file c90326a2ad0db5a8c9decaa2a316c5d7_genetics.112.145912-13.pdf]

**Table S1 Parameters and priors used in the one-population models and in models A, B, C, D and E.**

| Parameter                                                  | Prior                                       | Model                    |
|------------------------------------------------------------|---------------------------------------------|--------------------------|
| Current size Africa: $N_{Ac}$                              | $\text{unif}(1 \times 10^5, 1 \times 10^7)$ | Bottleneck and Expansion |
| Time of bottleneck Africa: $T_A$                           | $\text{unif}(1 \times 10^2, 4 \times 10^5)$ | Bottleneck and Expansion |
| Ancient size Africa: $N_{Aa}$                              | $\text{unif}(1 \times 10^5, 1 \times 10^7)$ | Bottleneck and Expansion |
| Severity of bottleneck Africa: $sev_A$ (decimal log)       | $\text{unif}(-2, 2)$                        | Bottleneck               |
| Time of split Africa-Europe (decimal log): $T_{AE}$        | $\text{unif}(4, 7)$                         | Model A,B,C,D,E          |
| Time of split Europe-North America (decimal log): $T_{EN}$ | $\text{unif}(4, 7)$                         | Model A,B                |
| Time of split Africa-North America (decimal log): $T_{AN}$ | $\text{unif}(4, 7)$                         | Model D,E                |
| Time of admixture (decimal log): $T_{adm}$                 | $\text{unif}(2, 4)$                         | Model C                  |
| Current size Europe: $N_{Ec}$                              | $\text{unif}(1 \times 10^4, 1 \times 10^7)$ | Model A,B,C,D,E          |
| Ancient size Europe (decimal log): $N_{Ea}$                | $\text{unif}(2, 5)$                         | Model A,B,C,D,E          |
| Current size North America: $N_{Nc}$                       | $\text{unif}(1 \times 10^4, 3 \times 10^7)$ | Model A,B,C,D,E          |
| Ancient size North America (decimal log): $N_{Na}$         | $\text{unif}(2, 5)$                         | Model A,B,C,D,E          |
| Proportion of European admixture: $Prop_{adm}$             | $\text{unif}(0.01, 0.99)$                   | Model C                  |
| Migration rate (decimal log): $M$                          | $\text{unif}(-10, -2)$                      | Model B,E                |
