# Supplementary material
Source: PubMed Central journal article supplement (PMC3527251)
Supplement: d8ada5290770a415cab875802882b94d_genetics.112.145912-11.pdf [file d8ada5290770a415cab875802882b94d_genetics.112.145912-11.pdf]

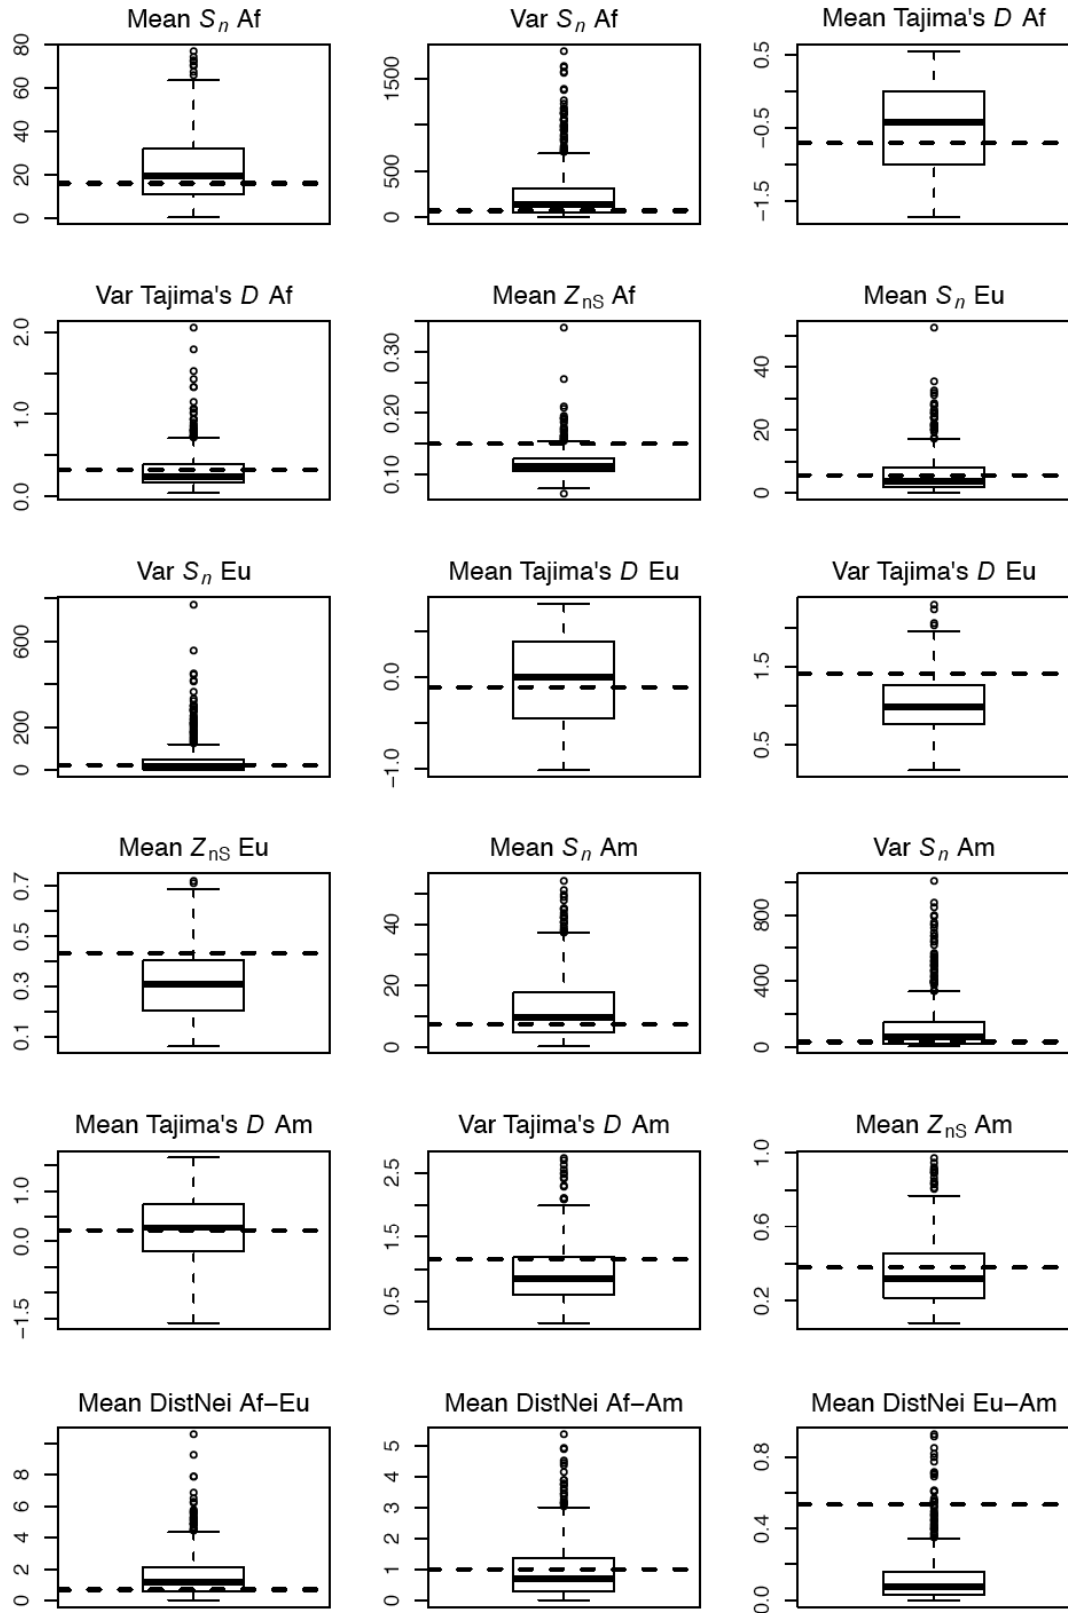

**Figure S11** Predicted statistics of model C. Predictions of the mean and variance of  $S_n$ , mean and variance of Tajima's  $D$  and mean  $Z_{nS}$  are shown for each population. Predicted mean Distance of Nei for all pairs of populations are shown as well. Statistics are predicted by sampling parameters from the posterior distributions based on the regression method (see main text for details).
