# Supplementary material
Source: PubMed Central journal article supplement (PMC3527251)
Supplement: e07d55bf016c765bc98c814da8b41bb9_genetics.112.145912-18.pdf [file e07d55bf016c765bc98c814da8b41bb9_genetics.112.145912-18.pdf]

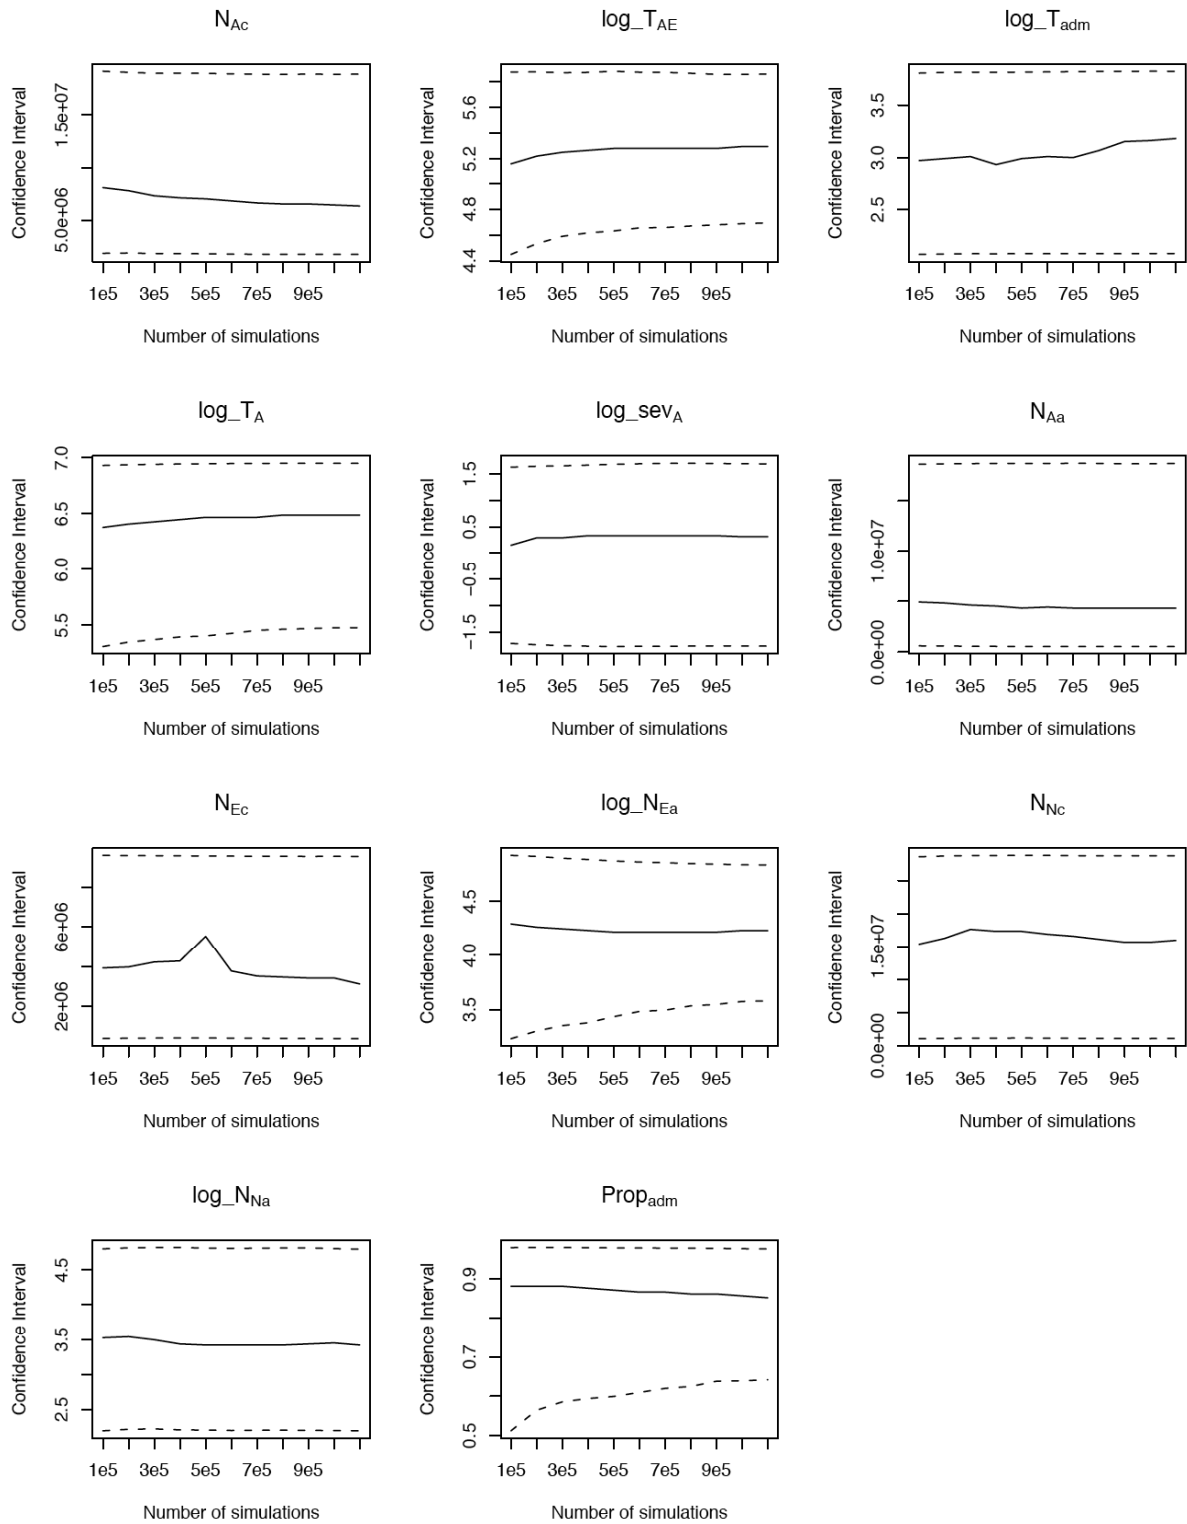

**Figure S5** Behavior of the modes and 95% confidence intervals of the estimates of the parameters of the Admixture model (model C) for different numbers of simulations. Solid line: mode, dashed lines: upper and lower confidence intervals.
