# Supplementary material
Source: PubMed Central journal article supplement (PMC3527251)
Supplement: f0f70f4d7034a9f8d78b945de0fe02da_genetics.112.145912-19.pdf [file f0f70f4d7034a9f8d78b945de0fe02da_genetics.112.145912-19.pdf]

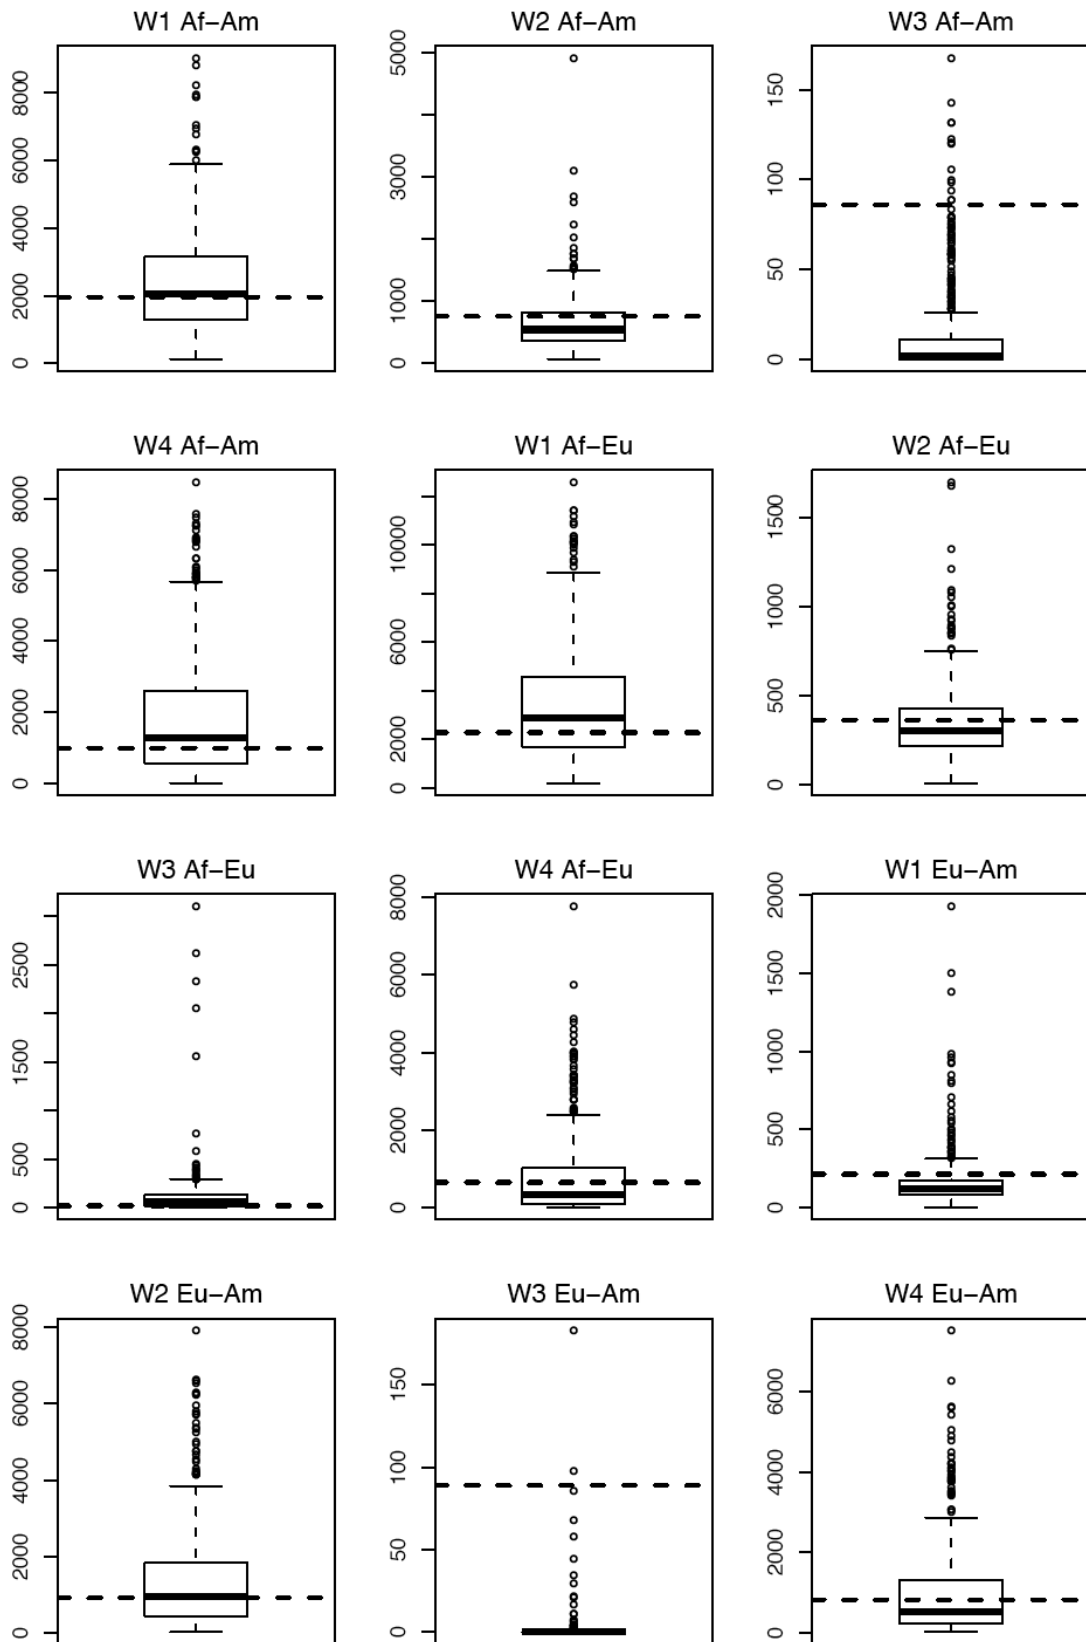

**Figure S12** Predicted JSFS of model C. Predictions of each Wakeley-Hey (1997) class are shown. Statistics are predicted by sampling parameters from the posterior distributions based on the regression method (see main text for details).
