# Supplementary material
Source: PubMed Central journal article supplement (PMC3527251)
Supplement: f26648765d3df7d97bf0432bce9fb8f7_genetics.112.145912-1.pdf [file f26648765d3df7d97bf0432bce9fb8f7_genetics.112.145912-1.pdf]

**Table S2 Three-population models covered in this study.**

| Model | Description                                                                                                                                                                                                      | Posterior Probability |
|-------|------------------------------------------------------------------------------------------------------------------------------------------------------------------------------------------------------------------|-----------------------|
| A     | “No migration” model. Comprises Africa as the ancestral population, colonization of Europe followed by exponential growth, and the colonization from Europe to North America with subsequent exponential growth. | < 0.001               |
| B     | “Migration” model, matches Model A but adds an equal migration rate between all populations starting at the colonization time of North America.                                                                  | < 0.001               |
| C     | “Admixture” model, equals the previous models until the North American population is founded through an admixture between Africa and Europe followed by exponential growth in North America.                     | > 0.999               |
| D     | “No migration II” model, North America and Europe split independently from Africa, no migration.                                                                                                                 | < 0.001               |
| E     | “Migration II” model, same as model D plus one single rate of migration starting when the North American population is founded.                                                                                  | < 0.001               |
