# Supplementary material
Source: PubMed Central journal article supplement (PMC3527251)

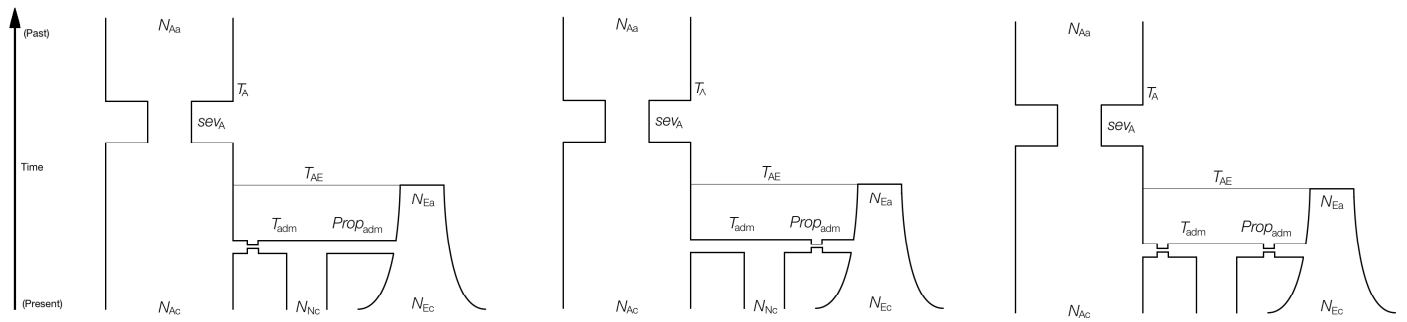

**Figure S15** Models C1 (left), C2 (middle) and C3 (right).

Supplement: a46e9fe55739d81983ea69ec440544e3_genetics.112.145912-6.pdf [file a46e9fe55739d81983ea69ec440544e3_genetics.112.145912-6.pdf]
